# Supplementary material
Source: PubMed Central journal article supplement (PMC4151246)
Supplement: NIHMS620221-supplement-Supplemental_Figure.pdf [file NIHMS620221-supplement-Supplemental_Figure.pdf]

# Supplementary Figure 1.

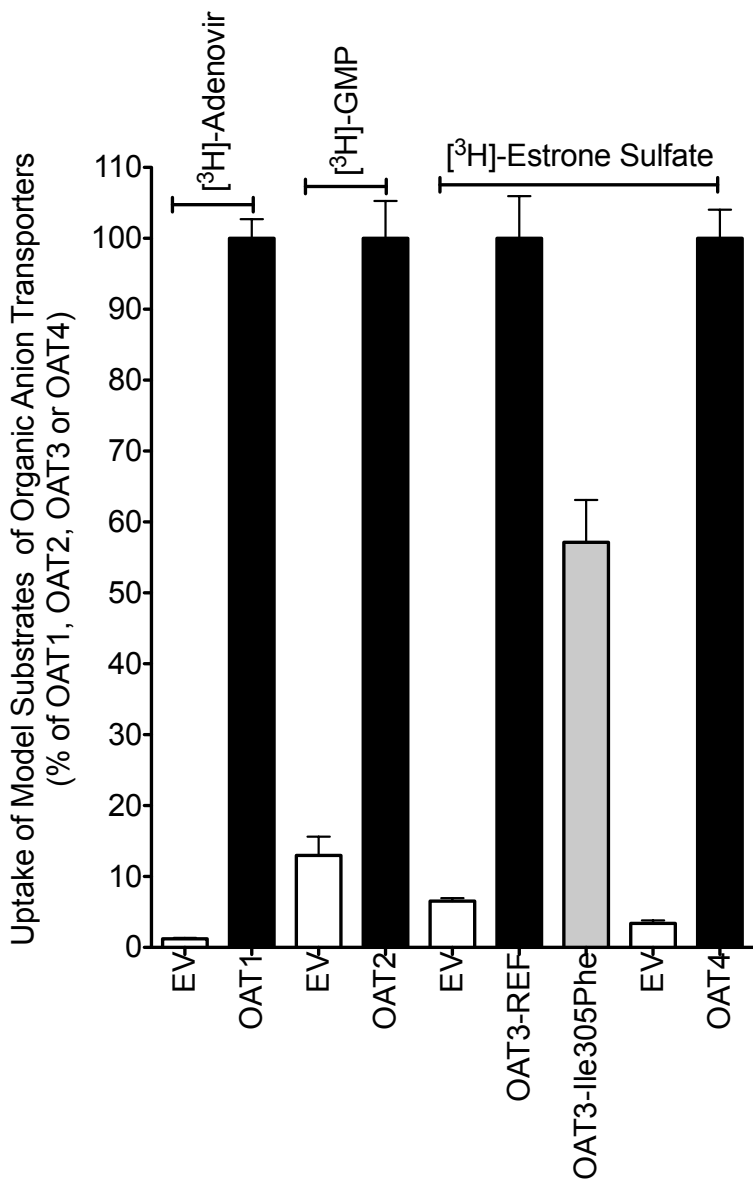

## Supplementary Figure 2(a)

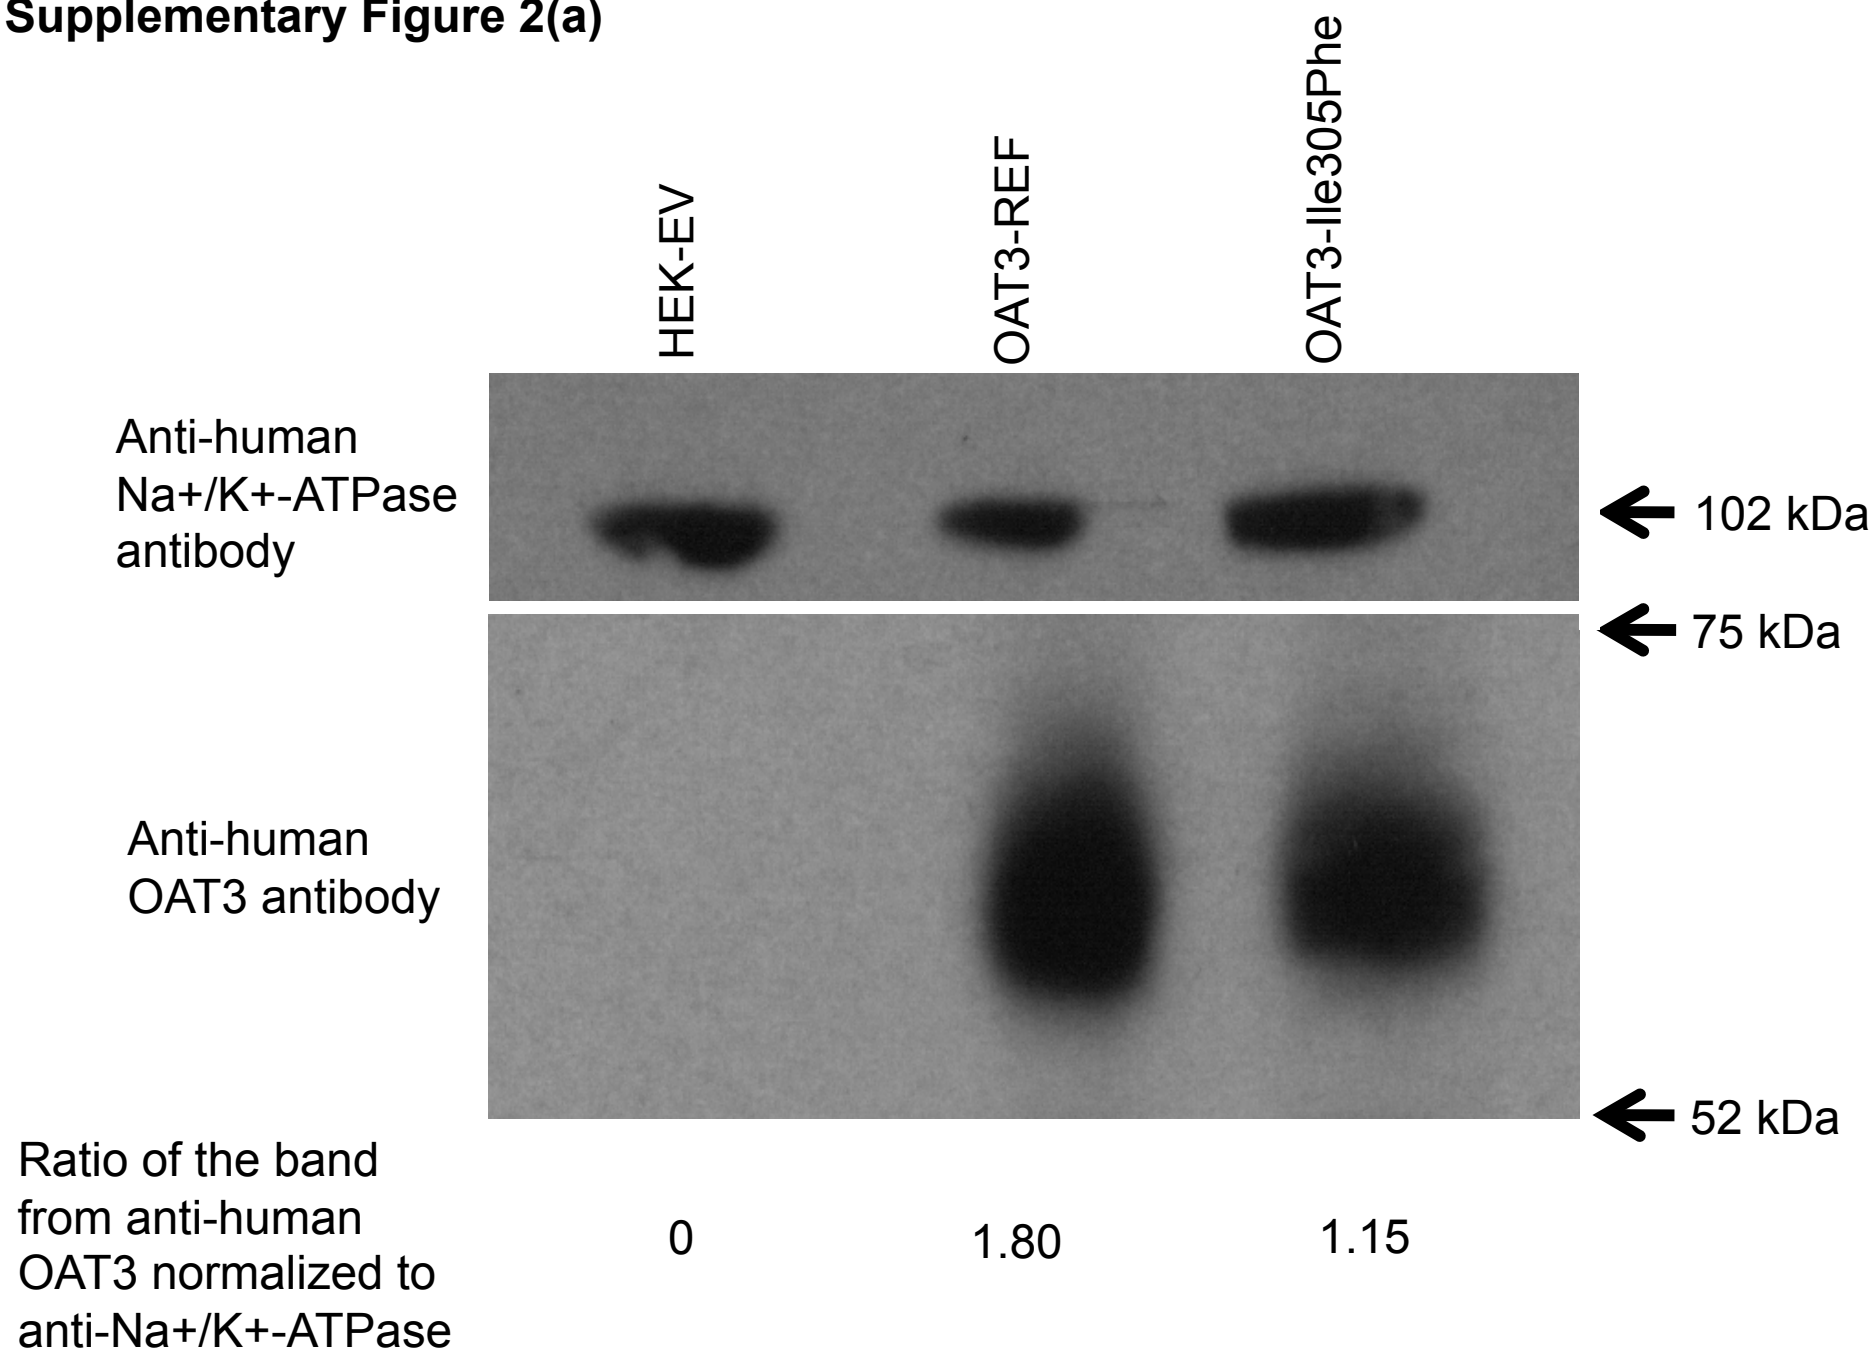

## Supplementary Figure 2(b)

Fold Change in *SLC22A8* mRNA expression levels compared to HEK293-Flp-In cells stably transfected with empty vector

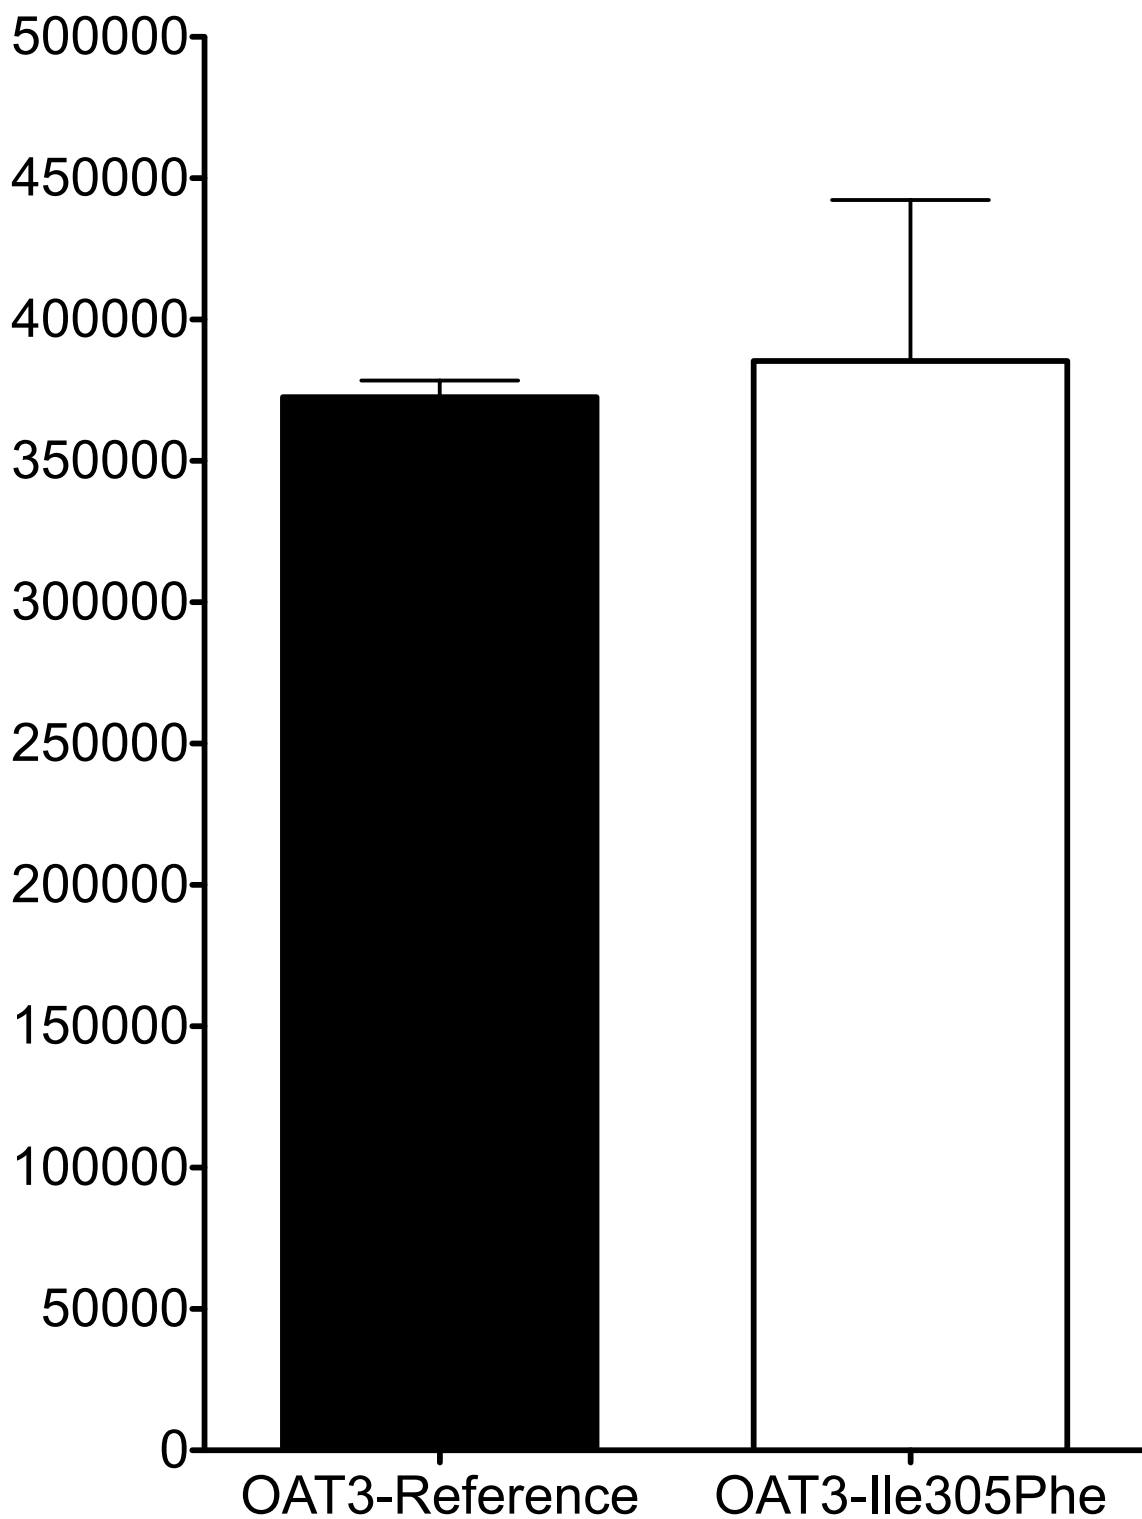

HEK293-Flp-In cells stably transfected with OAT3 cDNA

# Supplementary Figure 3

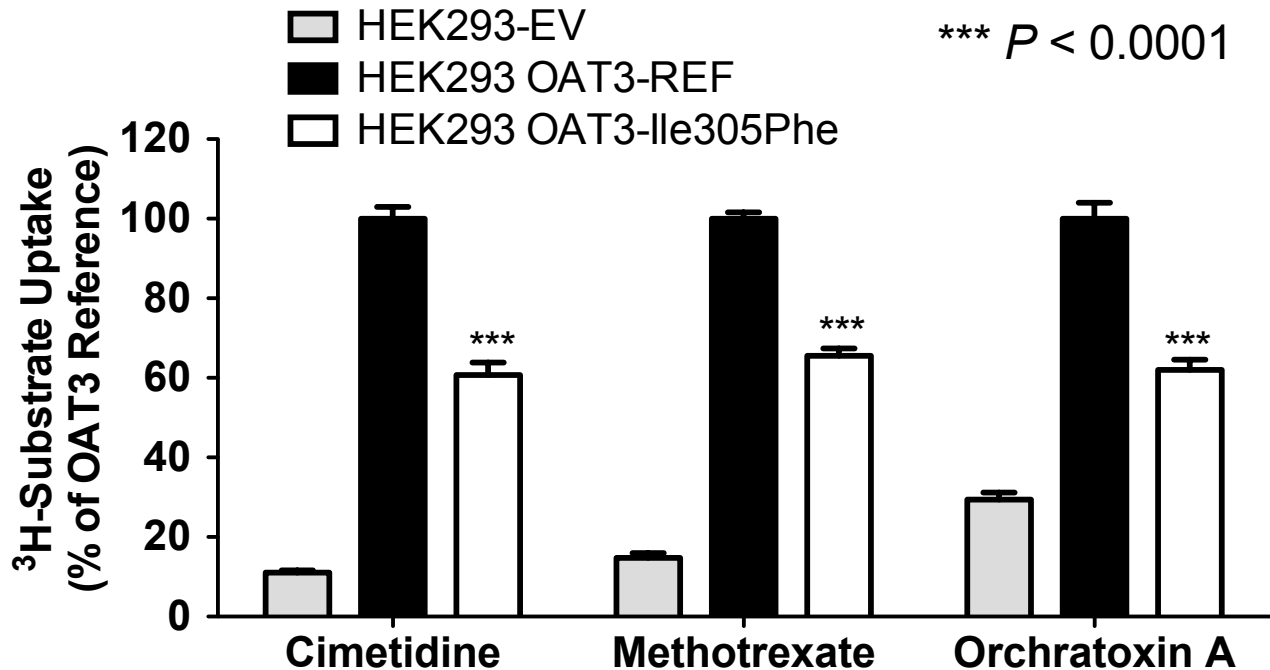

## Supplementary Figure 4.

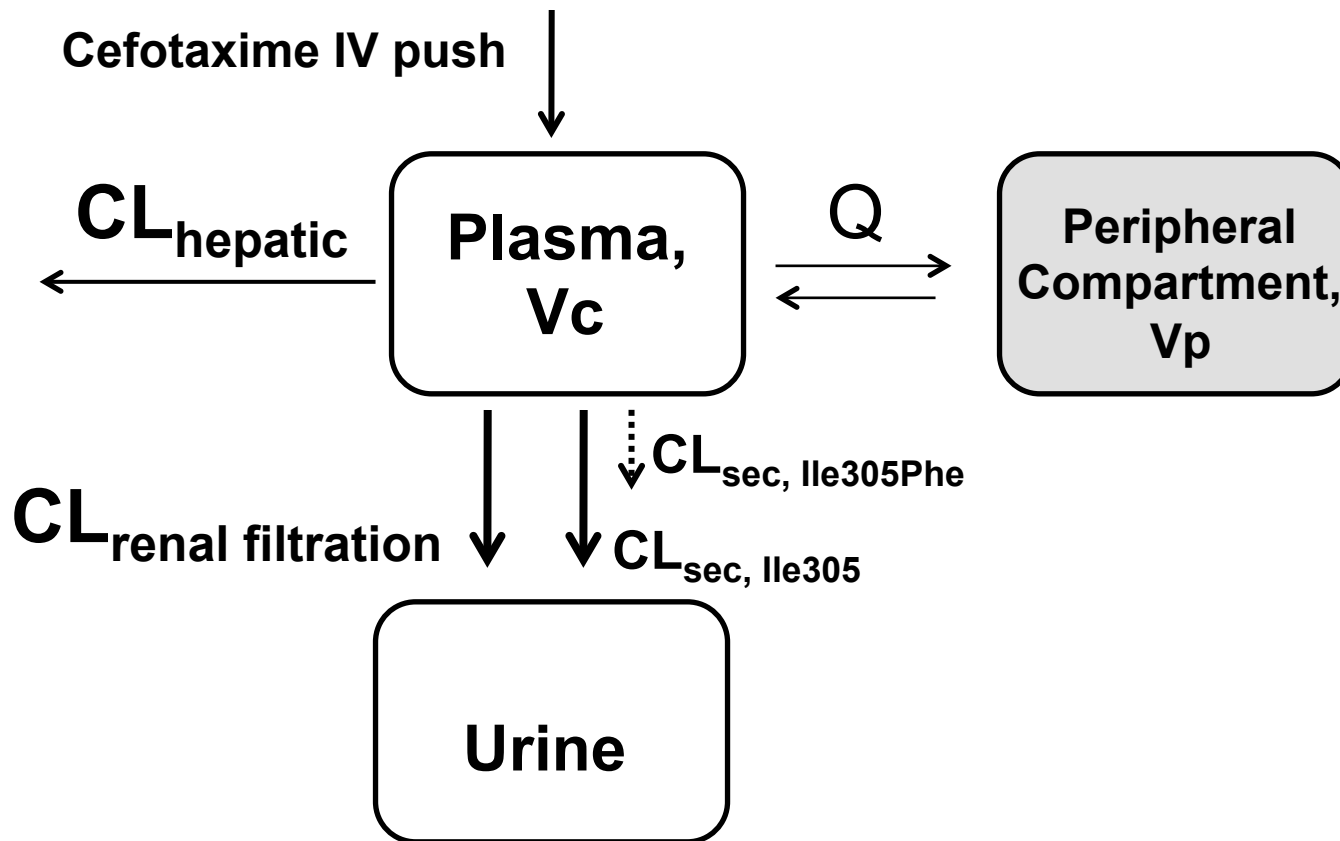

Equation 1a:  $CL = CL_{\text{hepatic}} + CL_{\text{renal}}$

Equation 1b:  $CL_{\text{renal}} = CL_{\text{filtration}} + CL_{\text{sec}}$
